# Supplementary material for: La viuda despojada y la hija amada
Source: Royal Society of Chemistry journal article supplement (doi:10.1039/c6tb02748b), 2011-01-01
Supplement: c6tb02748b1.pdf [file c6tb02748b1.pdf]

## Supplementary Information

### IGF-2 Coated Porous Collagen Microwells for the Culture of Pancreatic Islets

A. Forget,<sup>a,f</sup> M. Waibel,<sup>b,f</sup> D. Rojas-Canales,<sup>c,f</sup> S. Chen,<sup>e</sup> N. Kawazoe,<sup>e</sup> F. Harding,<sup>a,f</sup> T. Loudovaris,<sup>b,f</sup> P. T. H. Coates,<sup>c,f</sup> A. Blencowe,<sup>d,f</sup> G. Chen,<sup>e</sup> and N. H. Voelcker\*<sup>a,f</sup>

<sup>a.</sup> Future Industries Institute, University of South Australia, University Blvd., Mawson Lakes, SA 5095, Australia.

<sup>b.</sup> St Vincent's Institute, 9 Princes Street, Fitzroy, VIC 3065, Australia.

<sup>c.</sup> Royal Adelaide Hospital, Centre for Clinical and Experimental Transplantation, Frome Road, Adelaide, SA 5000, Australia.

<sup>d.</sup> School of Pharmacy and Medical Sciences, University of South Australia, Frome Road, Adelaide, SA 5000, Australia.

<sup>e.</sup> International Center for Materials Nanoarchitectonics, National Institute for Materials Science 1-1 Namiki, Tsukuba, Ibaraki 305-0044, Japan.

<sup>f.</sup> Collaborative Research Centre for Cell Therapy Manufacturing, Catherine Helen Spence Building, North Terrace, Adelaide, SA 5000, Australia

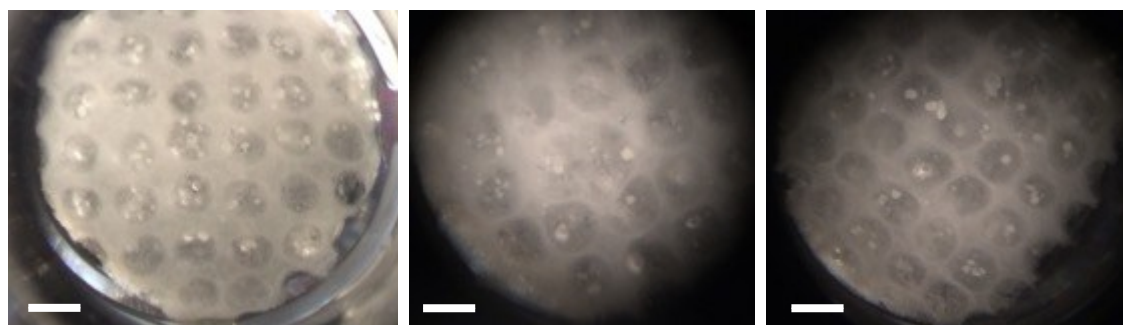

**Fig. S1:** Photographs of human islets loaded in the PCM arrays, showing the partition of the islets into microwells. Scale bars 1mm.

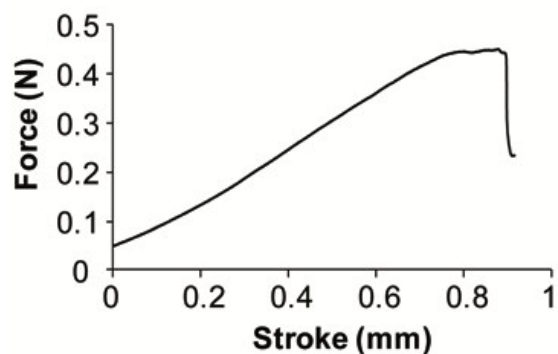

**Fig. S2:** Tensile testing of the PCM array. Representative test in elongation.

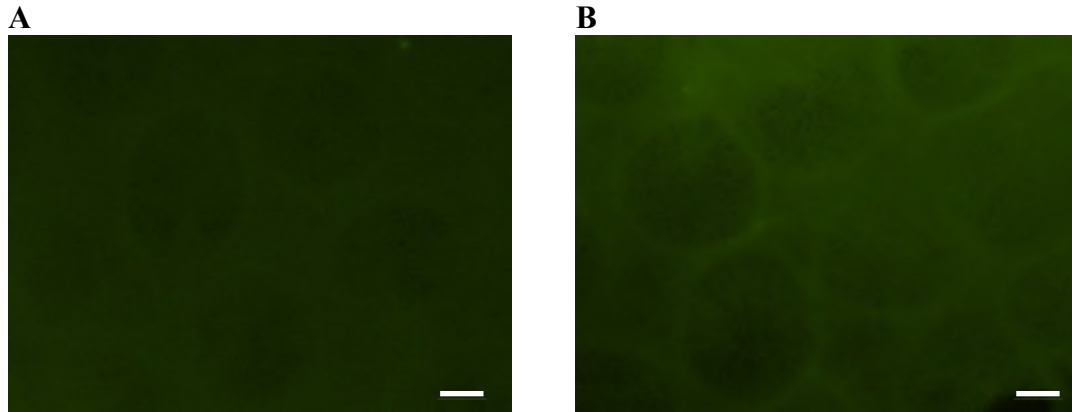

**Fig. S3:** Fluorescence microscopy images with high exposure time (1 s) of negative control, showing PCM arrays coated with (A) IGF-2-biotin without addition of avidin-FITC and (B)avidin-FITC. Scale bars 250  $\mu\text{m}$ .

---

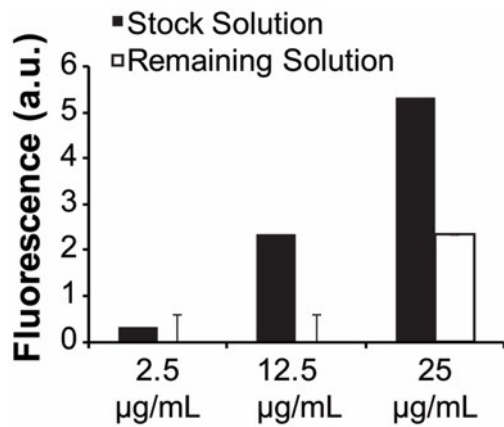

**Fig. S4:** Amount of IGF-2 remaining in the coating solution after immobilization on the PCM arrays showing optimum concentration is obtained for 12.5  $\text{ng}/\mu\text{L}$  were all the IGF-2 in the coating solution is immobilized on the scaffold.

---

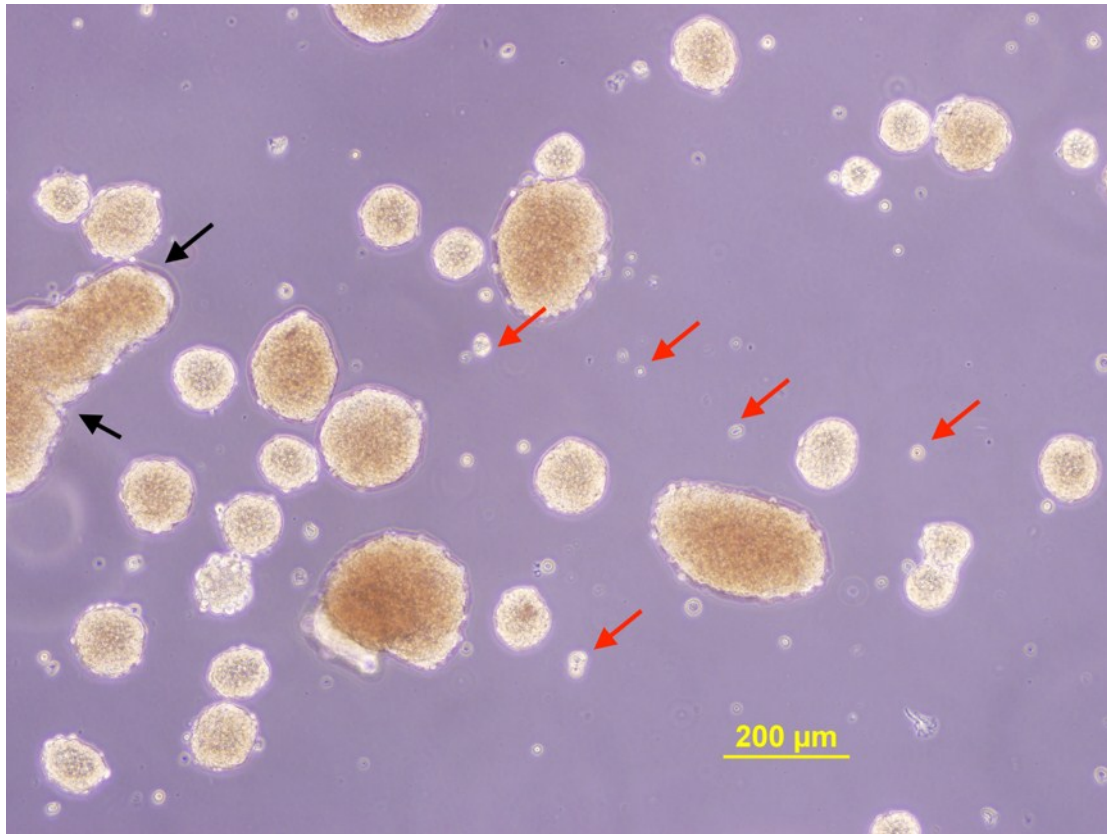

**Fig. S5:** Mouse islets cultured on tissue culture polystyrene for 16h, showing dissociation of the islet (red arrows) and aggregation of islet (black arrows).

---

**A** *PCM*

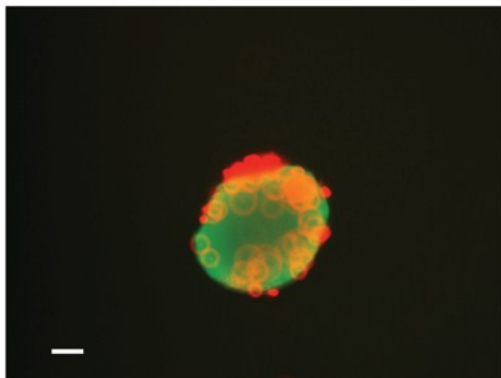

**B** *IGF-2 coated PCM*

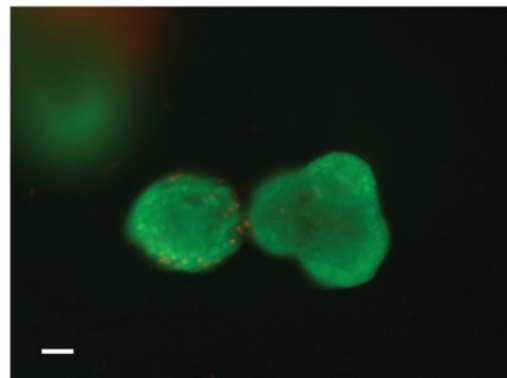

**Fig. S6:** Fluorescence microscopy images of FDA/PI stained mouse islets isolated in PCMs **(A)** with no coating, and **(B)** with IGF-2 coating. Living cells are stained green and dead cells are stained red. Scale bars 100  $\mu\text{m}$ .

---

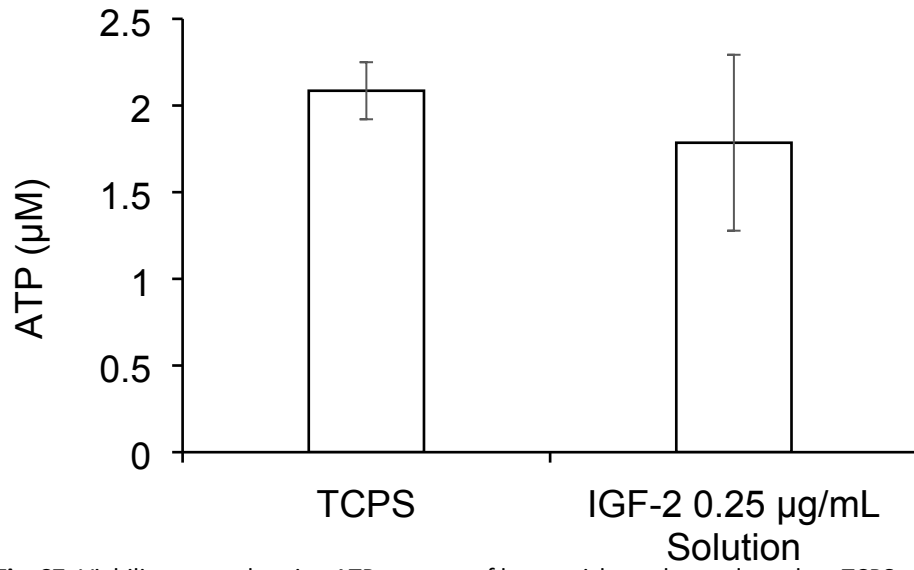

**Fig. S7:** Viability assay showing ATP content of human islets when cultured on TCPS and TCPS with 250 ng/mL of IGF-2 supplemented to the media.

---

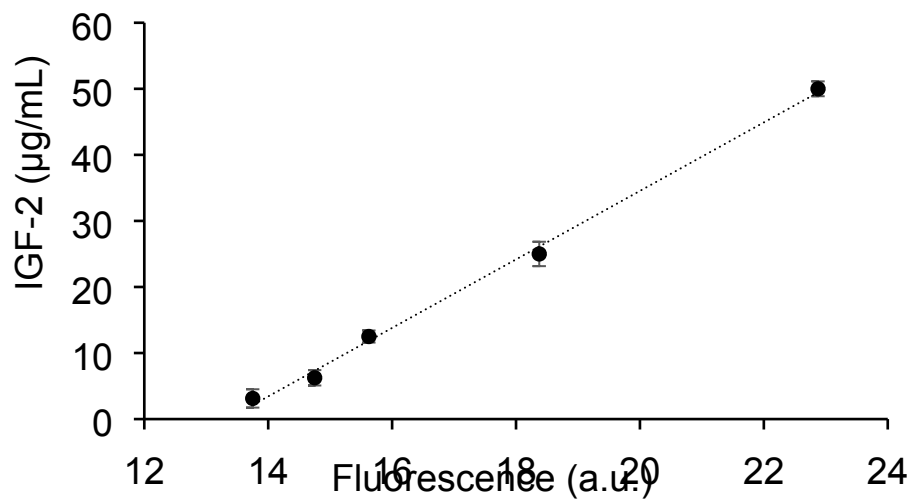

**Fig. S8:** Calibration curve of the IGF-2 labeled with FITC use for measuring the amount of IGF-2 release out of the IGF-2 coated PCM. Error bars are standard deviation for n=6.

---
